# Supplementary material
Source: PubMed Central journal article supplement (PMC2999475)

**Table 1. MRM transition energies to quantitate metabolites**

| <b>Compound</b>          | <b>MRM Transition (<i>m/z</i>) E</b> | <b>SI Mode</b> |
|--------------------------|--------------------------------------|----------------|
| N-Acetyl-L-phenylalanine | 208.1→120.0                          | Positive       |
| Creatinine               | 114.0→86.0                           | Positive       |
| DL-3-Indolelactate       | 204.0→158.0                          | Negative       |
| N-Phenylacetyl glycine   | 192.0→73.9                           | Negative       |
| L-Phenylalanine          | 166.0→103.0                          | Positive       |
| DL-3-Phenyllactic acid   | 164.9→103.0                          | Negative       |
| Riboflavin               | 377.2→172.1                          | Positive       |
| Xanthurenic Acid         | 206.0→132.0                          | Positive       |

**Figure 1. Authentication of metabolites identified in urine of wild-type and *Hnf1a*-null mice.** MSMS fragmentation patterns (A-J) were compared against the indicated authentic standard of the highest quality available. For each panel, the upper MSMS spectrum is from the indicated urine sample and the lower spectrum is of the standard. Panels A-H are spectra for ions increased in *Hnf1a*-null mice and panels I and J are ions decreased in *Hnf1a*-null mice. All spectra were acquired in positive mode with the exception of DL-3-phenyllactic acid. Retention time and TOFMS is indicated for each urine and standard comparison.

**Figure 2. Plasma ACTH concentration.** Plasma was collected by retroorbital bleeding from *Hnf1a*-null mice within 3 hours of the initiation of the light cycle. A highly sensitive and specific ELISA assay for the ACTH peptide (Cat#AC562T-100; Calbiotech Inc., Spring Valley, CA) was used to quantify ACTH. Horizontal bars are the average concentration and whiskers represent the 5-95% confidence interval. One sample in each genotype (indicated by red dot) was determined to be an outlier based on the confidence interval as well as the Grubbs' Test. The average ACTH concentration in wild-type mice was 158 pg/mL compared to 48.02 pg/mL in *Hnf1a*-null mice when all samples are included ( $p=0.199$ ). When outliers are removed, the average wild-type ACTH concentration is 73.3 pg/mL compared to 31.58 pg/mL in *Hnf1a*-null mice ( $p=0.027$ ).

# Supplemental Figure 1.

**A.** Ret. Time 1.76 min, TOFMS 166.07ESI+

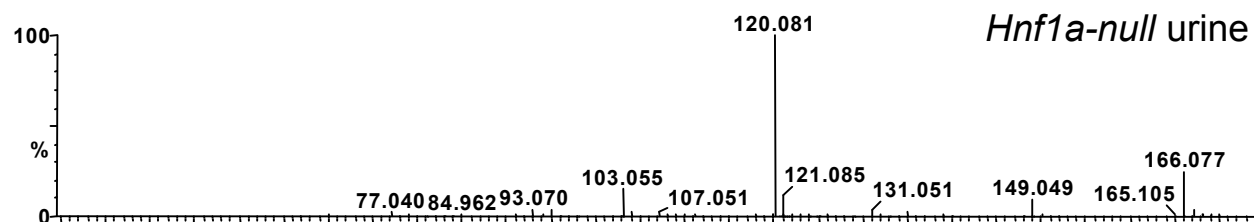

jb090416\_Hnf1KO\_standards\_035 133 (1.791)

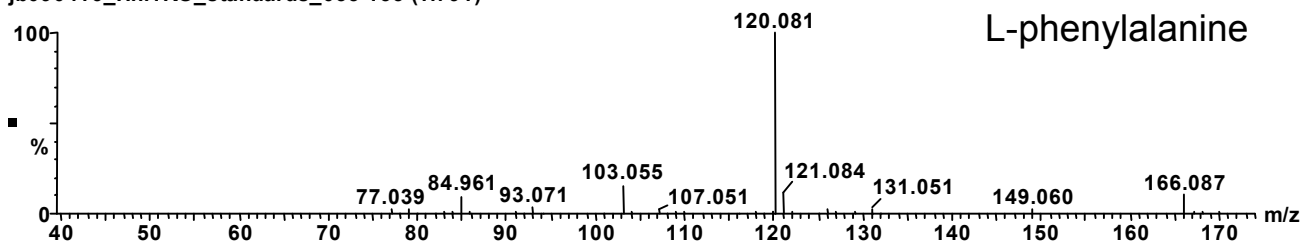

**B.** Ret. Time 3.78 min, TOFMS 208.08 ESI+

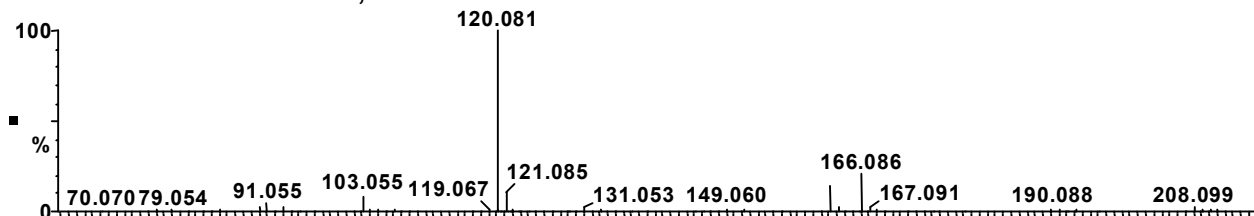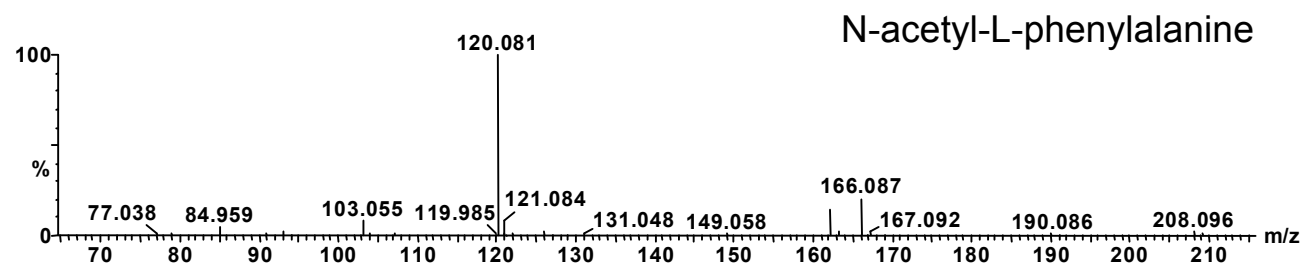

**C.** Ret. Time 2.98 min, TOFMS 194.07 ESI+

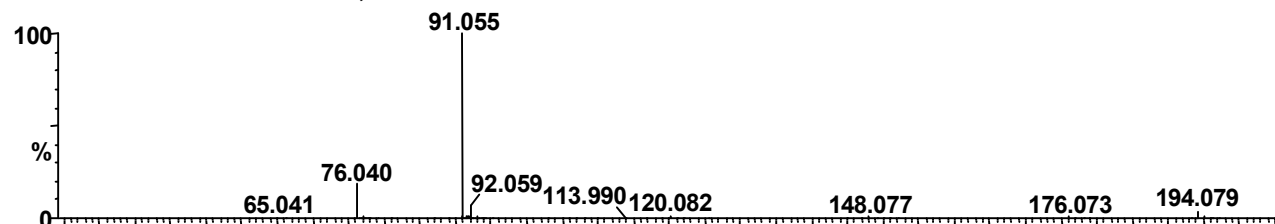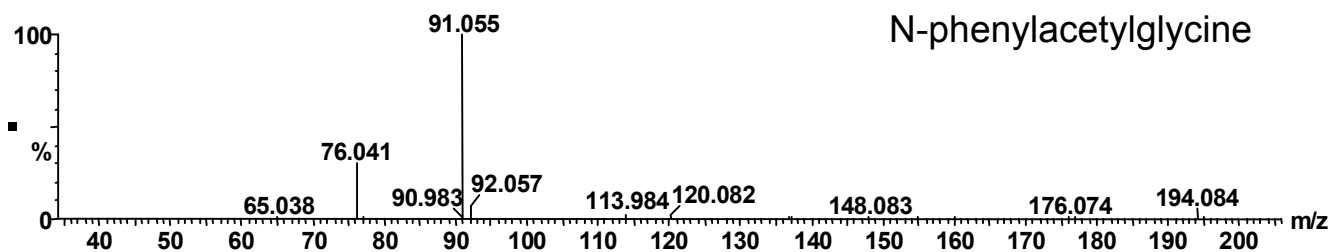

**D.** Ret. Time 3.44 min, TOFMS 165.06ESI-

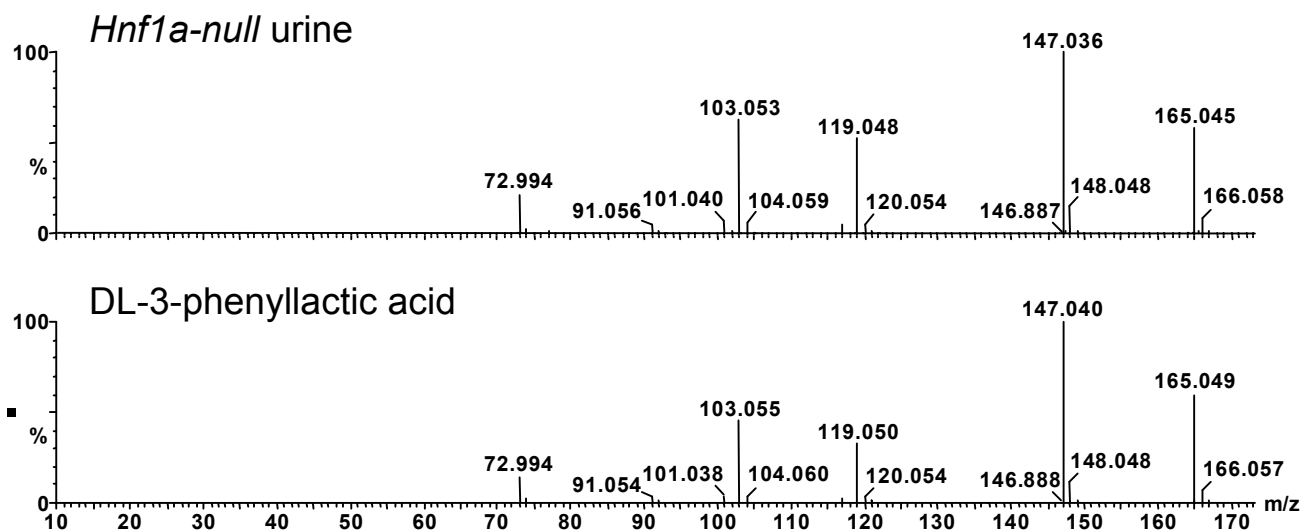

**E.** Ret. Time 3.48 min, TOFMS 206.07 ESI+

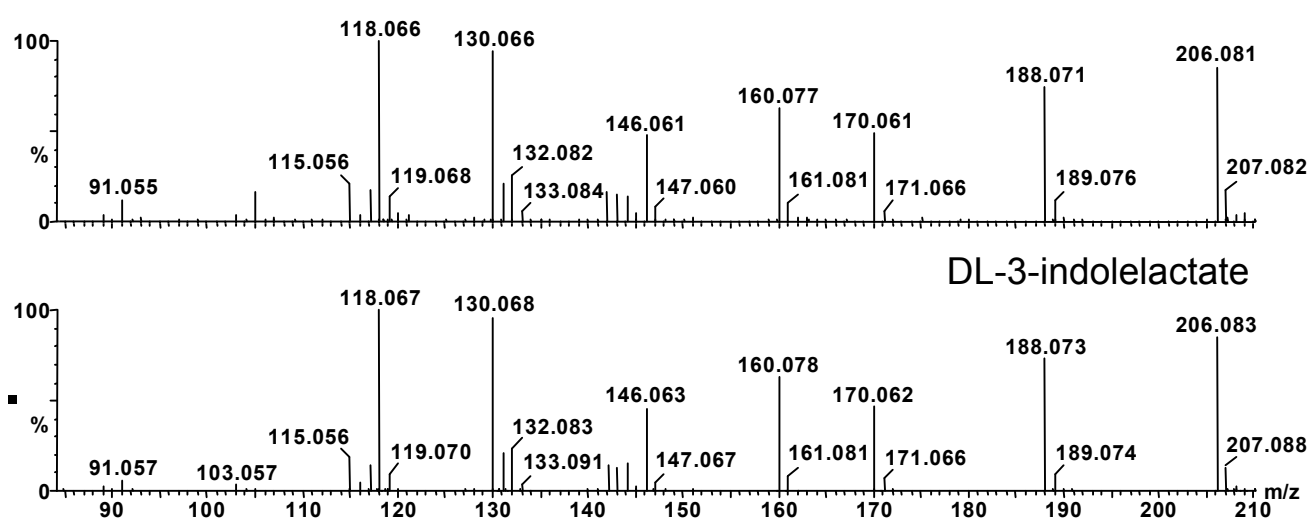

**F.** Ret. Time 4.98 min, TOFMS 361.20 ESI+

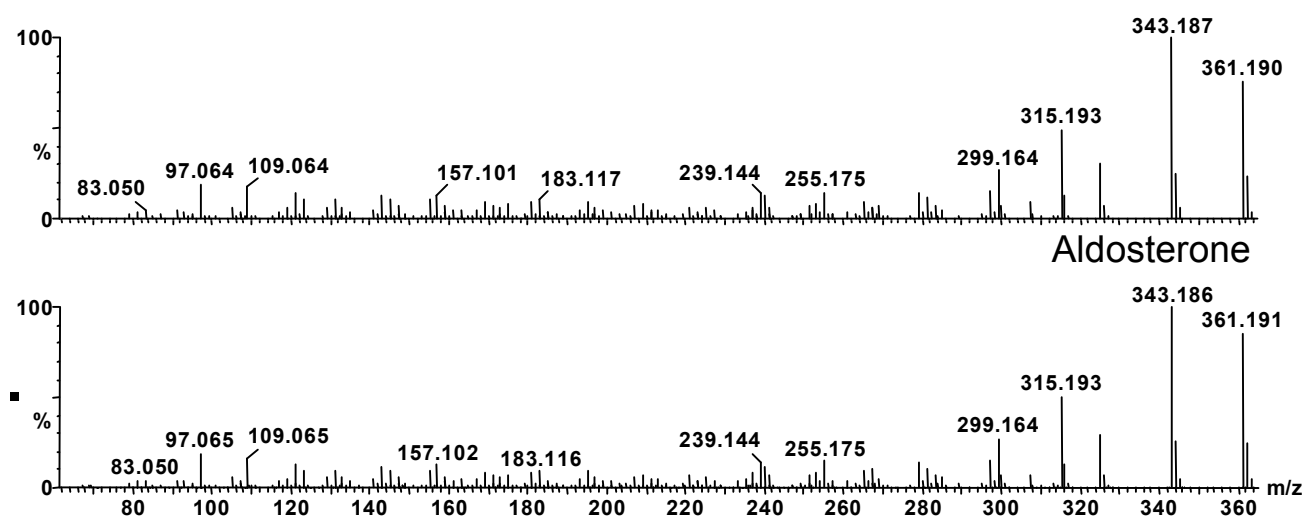

**G.** Ret. Time 5.24 min, TOFMS 363.00ESI+  
*Hnf1a*-null urine

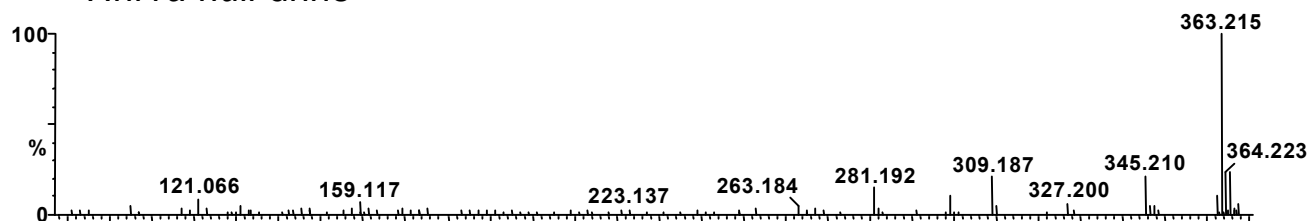

DHOPA

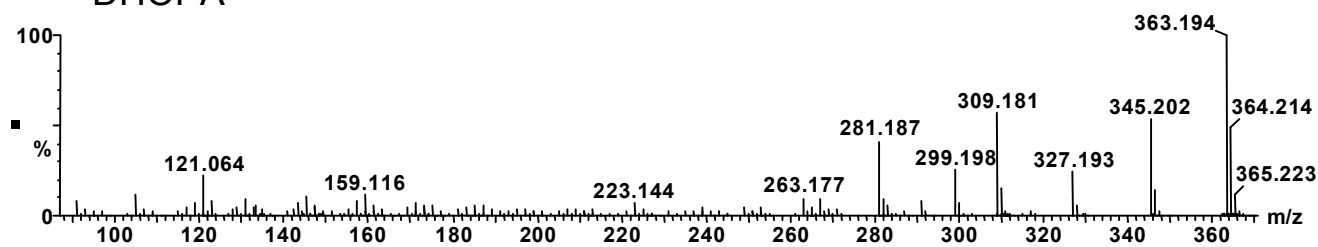

**H.** Ret. Time 5.28 min, TOFMS 361.00 ESI+

*Hnf1a*-null urine

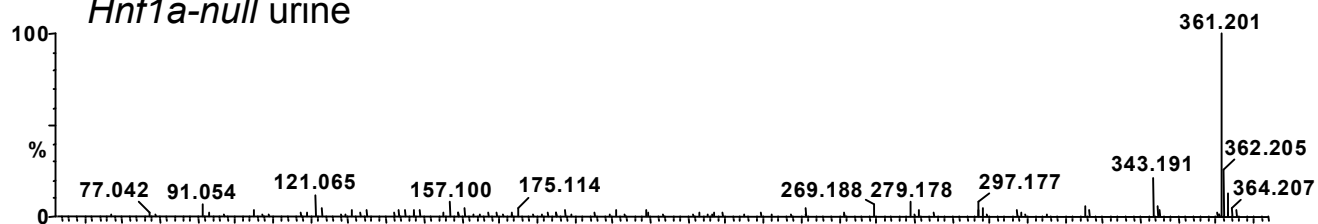

HDOPA

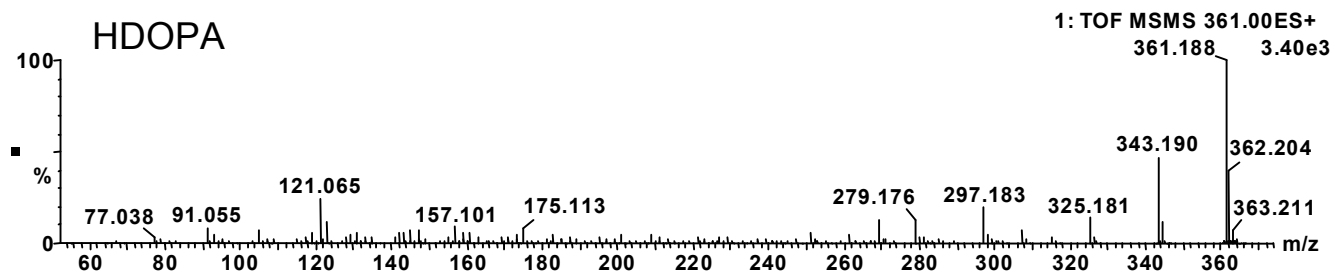

I. Ret. Time 2.88 min, TOFMS 377.20ESI+  
Wild-type urine

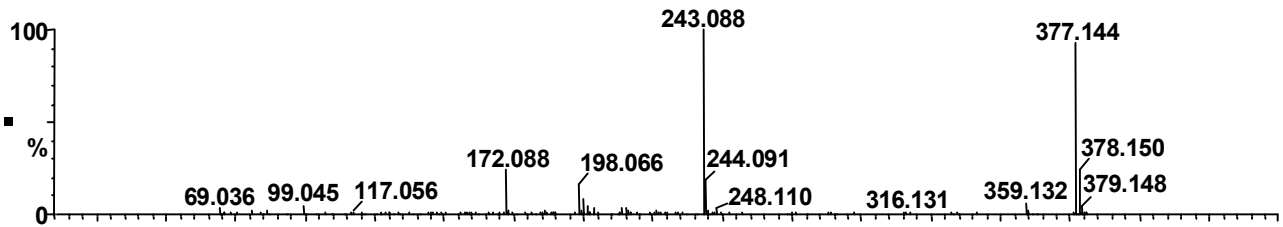

Riboflavin

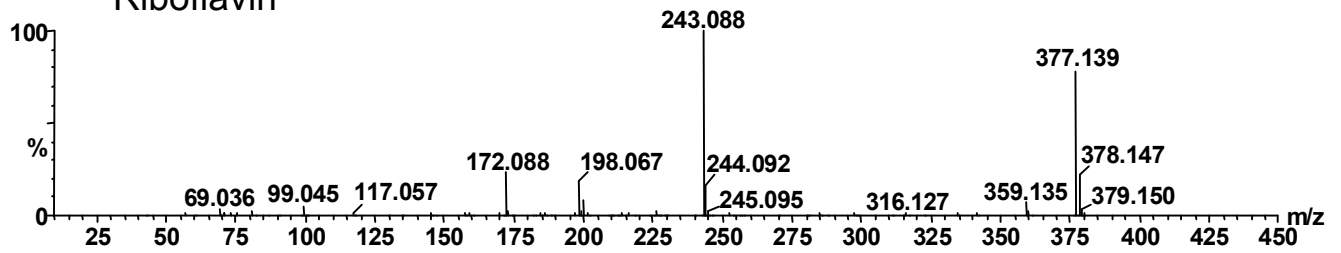

J. Ret. Time 1.79 min, TOFMS 206.07 ESI+

Wild-type urine

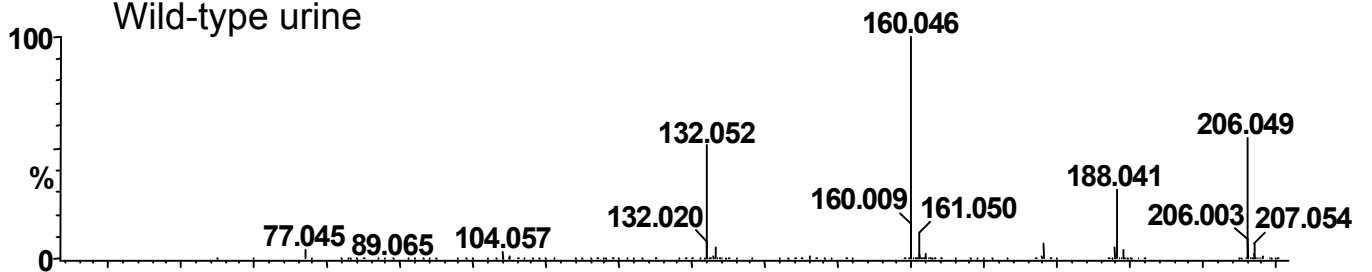

Xanthurenic Acid

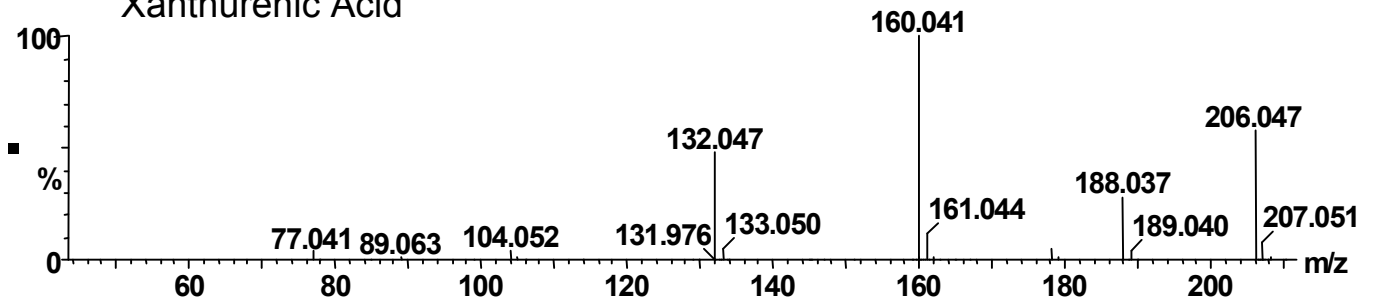

# Supplemental Figure 2

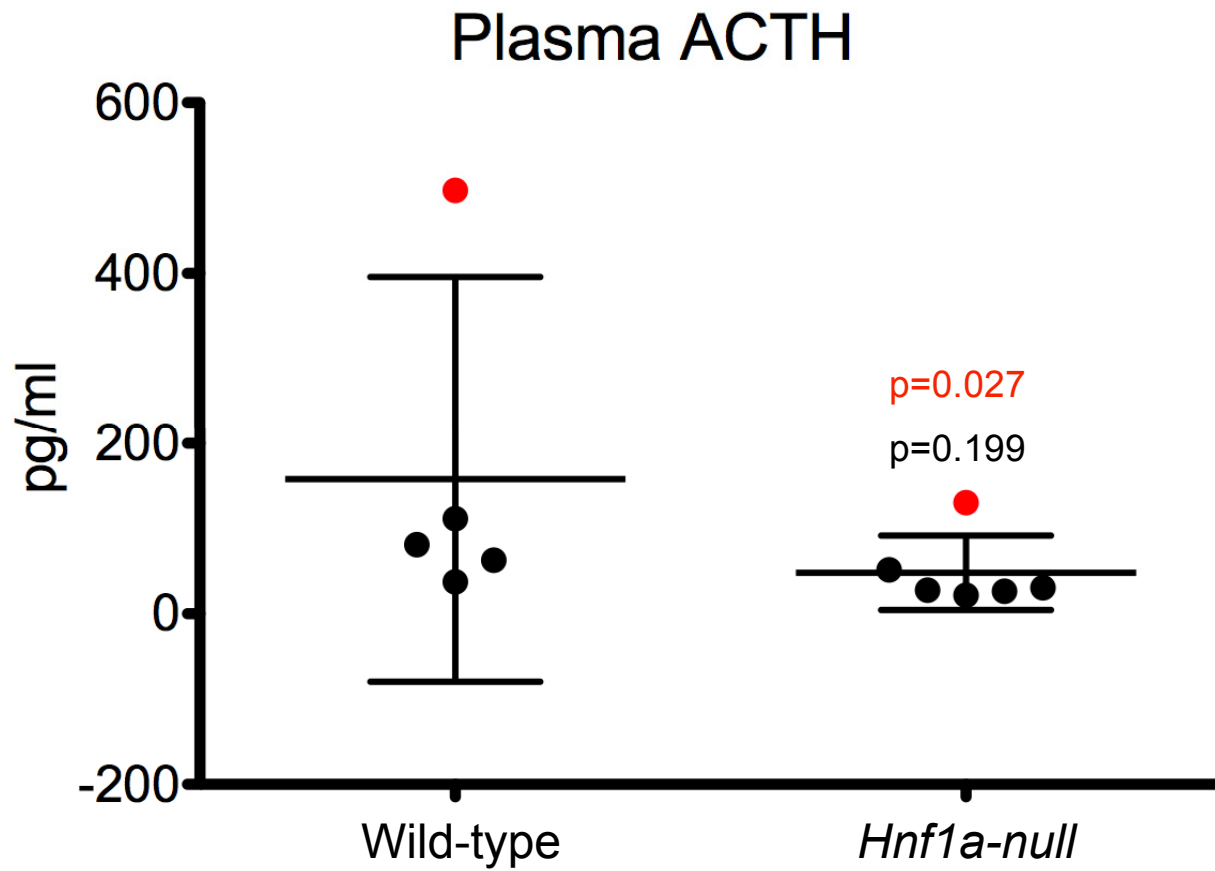

Supplement: me.2010-0130_1.pdf [file me.2010-0130_1.pdf]
